# Individual-level specialisation and interspecific resource partitioning in bees revealed by pollen DNA metabarcoding

Jan Klečka<sup>1,\*</sup>, Michael Mikát<sup>2</sup>, Pavla Koloušková<sup>1</sup>, Jiří Hadrava<sup>1,2</sup>, and Jakub Straka<sup>2</sup>

<sup>1</sup>Institute of Entomology, Biology Centre of the Czech Academy of Sciences, České Budějovice, Czech Republic

<sup>2</sup>Department of Zoology, Faculty of Science, Charles University, Prague, Czech Republic

Corresponding author:

Jan Klečka\*, e-mail: [jan.klecka@entu.cas.cz](mailto:jan.klecka@entu.cas.cz)

## ABSTRACT

It is increasingly recognised that intraspecific variation in traits, such as morphology, behaviour, or diet is both ubiquitous and ecologically important. While many species of predators and herbivores are known to display high levels of between-individual diet variation, there is a lack of studies on pollinators. It is important to fill in this gap because individual-level specialisation of flower-visiting insects is expected to affect their efficiency as pollinators with consequences for plant reproduction. Accordingly, the aim of our study was to quantify the level of individual-level specialisation and foraging preferences, as well as interspecific resource partitioning, across different temporal scales in three co-occurring species of bees of the genus *Ceratina* (Hymenoptera: Apidae: Xylocopinae), *C. chalybea*, *C. nigrolabiata*, and *C. cucurbitina*. We conducted a field experiment where we provided artificial nesting opportunities for the bees and combined a short-term mark-recapture study with the dissection of the bees' nests to obtain repeated samples from individual foraging females and complete pollen provisions from their nests. Hence, we could study variation of the composition of pollen collected by the bees at different temporal scales. We used DNA metabarcoding based on the ITS2 locus to identify the composition of the pollen samples. We found that the composition of pollen carried on the bodies of female bees and stored in the brood provisions in their nests significantly differed among the three co-occurring species. At the intraspecific level, individual females consistently differed in their level of specialisation and in the composition of pollen carried on their bodies and stored in their nests. Our study thus provides evidence of consistent individual-level specialisation in pollinators across multiple temporal scales. We also demonstrate that higher generalisation at the species level stemmed from larger among-individual variation in diets as observed in other types of consumers, such as predators. Our study thus reveals how specialisation and foraging preferences of bees change from the scale of individual foraging bouts to complete pollen provisions accumulated in their nests over their lifetime. Such multi-scale view of foraging behaviour is necessary to improve our understanding of the functioning of plant-flower visitor communities.

## INTRODUCTION

Intraspecific variation in morphological and physiological traits, behaviour, and diet is common in many types of animals and has important implications for ecological processes at the population and community levels (Bolnick et al., 2003, 2011; Araújo et al., 2011). For example, between-individual variation in specialisation and dietary preferences may have strong effects on the structure and stability of ecological networks Bolnick et al. (2011). These effects stem from a potential disconnect between specialisation at the species (or population) level and the individual level. Total niche width of a species can be decomposed into individual-level niche width and between-individual variation (Roughgarden, 1972, 1974). An animal may thus be generalised at the species level in two fundamentally different ways: either all individuals have a similar generalised diet or different individuals are specialised on different resources. Although the existence of between-individual variation in diet has been recognised for a long time and formed a basis of Van Valen's niche expansion hypothesis (Van Valen, 1965), the potential ecological importance of between-individual diet variation has been neglected until a relatively recent resurgence of interest in

46 individual variation (Bolnick et al., 2003; Araújo et al., 2011; Bolnick et al., 2011).

47 A large amount of evidence demonstrating that many species of animals have high levels of between-  
48 individual variation in diets has been accumulated (Bolnick et al., 2003; Araújo et al., 2011), but most  
49 published studies focused on predators, particularly vertebrates. We are aware of only two studies on  
50 flower-visiting insects which studied between-individual variation in diets using repeated observations  
51 of the same individuals as required to properly describe individual diets (Bolnick et al., 2002, 2003). In  
52 their landmark study, Heinrich (1976) found that individual bumblebees specialised on different flowering  
53 plants not only during a single foraging bout, but also over a longer time frame, although the evidence was  
54 rather anecdotal. More recently, Szigeti et al. (2019) provided quantitative evidence for between-individual  
55 variation in flower visitation by a butterfly, *Parnassius mnemosyne*, partly related to temporal changes in  
56 flower abundance. However, more data are needed to test the generality of these results and to evaluate  
57 their implications for plant-pollinator interactions (Brosi, 2016).

58 To make matters more complicated, specialisation may further vary at different temporal scales within  
59 an individual, e.g. a pollinator may be highly specialised during a single foraging bout, which is often  
60 called "floral constancy" or "flower constancy", but have a substantially broader diet over its lifetime  
61 (Heinrich, 1976; Brosi, 2016). Flower constancy may have a strong effect on the reproductive success  
62 of insect-pollinated plants because high specialisation during a single foraging bout increases both male  
63 and female fitness of the plants by increasing the probability of pollen transfer to a flower of the same  
64 plant species and by minimising the deposition of heterospecific pollen harmful to plant female fitness  
65 (Waser, 1978; Morales and Traveset, 2008). Although flower constancy has been demonstrated in many  
66 pollinators, including social and solitary bees, butterflies, and hoverflies (Heinrich, 1976; Waser, 1986;  
67 Lewis, 1986; Goulson and Wright, 1998; Slaa et al., 1998; Amaya-Márquez, 2009), it considers foraging  
68 decisions only over a very short temporal scale, often over only several consecutive flower visits. On the  
69 other hand, we lack information on the variation among foraging bouts of the same individuals over a  
70 longer time scale with the few exceptions mentioned above (Heinrich, 1976; Szigeti et al., 2019).

71 Embracing a multi-level view of foraging specialisation, with the partitioning of individual-level  
72 specialisation, between-individual diet variation, and overall population- or species-level specialisation,  
73 can shed new light on interspecific interactions (Brosi, 2016). So far, it is known that large between-  
74 individual variation decreases the strength of intraspecific competition because each individual competes  
75 only with a subset of conspecifics, but it may increase the strength of interspecific competition. Species and  
76 individuals may thus respond in different ways to changes in the strength of intraspecific or interspecific  
77 competition, such as by changing individual diet width (Fontaine et al., 2008; Brosi and Briggs, 2013) or  
78 changing the level of diet overlap among individuals in the population (Van Valen, 1965; Bolnick et al.,  
79 2007). Different strategies may be employed also by different individuals in the same population. For  
80 example, some individuals may be specialised, which makes them more efficient in resource use (Strickler,  
81 1979; Hofstede and Sommeijer, 2006), while others are more generalised. Switching between resources  
82 incurs costs because of memory and learning constraints (Lewis, 1986; Gegear and Laverty, 1998), but  
83 more flexible individuals capable of switching between different types of resources may better cope with  
84 spatial and temporal variation in resource availability (Hofstede and Sommeijer, 2006). At the species  
85 level, there is a strong support for the hypothesis that populations with larger between-individual variation  
86 are less vulnerable to environmental changes in various groups of organisms (Forsman and Wennersten,  
87 2016). High between-individual variation together with the foraging flexibility of flower-visiting insects  
88 may underpin the robustness of plant-flower visitor networks to habitat destruction (Noreika et al., 2019)  
89 or loss of resources (Biella et al., 2019a, 2020). Studies combining measures of between-individual diet  
90 variation and interspecific resource partitioning are thus needed to shed more light on the ecological  
91 consequences of individual-level diet variation.

92 We studied foraging preferences and specialisation in three sympatric species of mostly solitary bees  
93 of the genus *Ceratina* to address several of the current knowledge gaps. Specifically, we used pollen  
94 DNA metabarcoding to analyse the level of specialisation in foraging for pollen at the interspecific and  
95 intraspecific levels. We compared pollen composition among nests build by different females, individual  
96 brood cells within the nests, and pollen collected during individual foraging bouts. Our aim was to test  
97 whether the three sympatric species differed in their foraging preferences, diet breadth at the species and  
98 individual levels, and in between-individual variation in diet composition. Such differences in foraging  
99 strategies could decrease the intensity of resource competition and facilitate species coexistence.

## 100 MATERIALS & METHODS

### 101 Species studied

102 The genus *Ceratina* Latreille, 1802 (Hymenoptera: Apidae: Xylocopinae) is a cosmopolitan genus of  
103 bees whose common ancestor was probably facultatively eusocial (Rehan et al., 2012). Most extant  
104 *Ceratina* species are also facultatively eusocial (Groom and Rehan, 2018), but the proportion of social  
105 nests is generally low, and solitary nesting prevails particularly in temperate climates (Groom and Rehan,  
106 2018; Mikát et al., 2020a). Also, some species are known for complex parental care (Mikát et al., 2016),  
107 including the only known example of biparental care in bees (Mikát et al., 2019). We focused on three  
108 species of the genus *Ceratina*, which are the most abundant bee species at the study site (see below),  
109 namely *C. chalybea*, *C. nigrolabiata*, and *C. cucurbitina*. All three species are morphologically similar  
110 and live mostly in warm grassland habitats. They build their nests in dead plant stems with soft pith, e.g.  
111 of *Rosa canina*, *Centaurea* spp., *Verbascum* spp., etc. This makes it easy to study their nesting behaviour  
112 and obtain pollen samples from their nests. The nest is made of a linear sequence of brood cells, whose  
113 relative age is easy to determine: the innermost brood cell is the eldest (Rehan and Richards, 2010).  
114 Although biparental care has been observed in *C. nigrolabiata*, only the female provisions the nest, while  
115 the male's role is to guard the nest (Mikát et al., 2019). Hence, only a single female provisions each nest  
116 during the brood establishment in the species we studied.

### 117 Study site and experimental design

118 We conducted a field experiment in the Havranické vřesoviště Natural Monument, in the Podyjí National  
119 Park, near Znojmo, in the Czech Republic (GPS: 48.8133N, 15.999E) in the spring and summer 2017. The  
120 administration of the Podyjí National Park provided a research permit. The study site and its surroundings  
121 comprises of a heathland and dry open grasslands with solitary trees and shrubs. We installed artificial  
122 nesting opportunities in the grassland following the methods used in previous research at the study site  
123 (Mikát et al., 2016, 2019). The artificial nesting opportunities consisted of sheaves containing 20 cut stems  
124 of *Solidago canadensis*. Each stem was 40 cm long. The sheaves were attached in a vertical orientation to  
125 a thin bamboo stick fixed to the ground. We distributed several hundred sheaves as nesting opportunities  
126 in the study site in April before the beginning of the nesting season.

### 127 Sampling in the field

128 Field sampling consisted of two phases. In the first phase, we collected a subset of the occupied artificial  
129 nests on 5 July 2017 and sampled all pollen stored in individual nests. We collected the nests after the  
130 end of the bees' foraging activity, around sunset, when the female bees can be usually found inside  
131 the nests (Mikát et al., 2016, 2017, 2019), which allowed us to reliably identify the species to which  
132 the nest belonged. We carefully opened the nests in a field laboratory with clippers and collected the  
133 pollen provisions from individual brood cells using sterilised forceps, stored the samples in individual  
134 microtubes, and dried them at room temperature in a desiccator with silica gel. The ID of the nest and  
135 the ID of the brood cell within the nest (brood cells ordered as 1, 2, etc. starting with the eldest one)  
136 was recorded along with information about the developmental stage of offspring in each brood cell (egg,  
137 larva with its instar identified, or pupa), which we use to estimate the relative brood cell age. Most of  
138 the nests were not yet fully developed, i.e. they contained mostly eggs and larvae, only some of them  
139 contained pupae in the oldest brood cells, and no offspring has matured yet. We collected pollen from  
140 brood cells with unconsumed provisions, i.e. those containing eggs or young larvae (alive or dead). In  
141 total, we obtained 227 samples from 66 nests of these three species containing a sufficient amount of  
142 pollen for the purpose of our analyses (i.e., unconsumed pollen in at least two brood cells); 52 samples  
143 from 17 nests of *C. chalybea*, 131 samples from 36 nests of *C. nigrolabiata*, and 44 samples from 13 nests  
144 of *C. cucurbitina*.

145 In the second phase of the fieldwork, we conducted a mark-recapture study of the three *Ceratina*  
146 species from 29 July to 1 August 2017. We used the same type of artificial nests as described above  
147 arranged in an array over the area of ca. 10 x 5 m. We individually marked females of the three species  
148 captured during the provisioning of their nests. The females were marked by a combination of colour  
149 spots on the abdomen. Females were recaptured during four days when they were returning to their nests  
150 from foraging bouts. This allowed us to sample pollen collected by the captured female during individual  
151 foraging bouts. Capturing the females on return to their nests was facilitated by blocking the entrance  
152 to their nests while they were foraging (Mikát et al., 2017). We used sterile aspirators for individual

153 recaptures to prevent contamination. We briefly anaesthetised the captured bee using CO<sub>2</sub>, scrapped the  
154 pollen carried on the underside of the abdomen using a single-use toothpick with a small piece of cotton  
155 attached to the end (a miniature analogue of cotton buds for ear cleaning), and stored the pollen in a 2 ml  
156 tube. In total, we collected 67 samples; 26 samples from 17 females of *C. chalybea*, 35 samples from 23  
157 females of *C. cucurbitina*, but only six samples from five females of *C. nigrolabiata*.

### 158 **Pollen DNA metabarcoding**

159 We extracted DNA from the pollen samples using the Macherey-Nagel NucleoSpin Food kit (Macherey-  
160 Nagel, Dürren, Germany) according to "the isolation of genomic DNA from honey or pollen" supple-  
161 mentary protocol developed by the manufacturer. Prior to DNA extraction, we homogenised each pollen  
162 sample with the CF Buffer from the NucleoSpin Food kit in a 2 ml tube using ceramic beads in a Precellys  
163 homogeniser similarly to Bell et al. (2017).

164 We amplified the ITS2 region (Chen et al., 2010) using standard primers for plant ITS2 used also in  
165 previous studies on pollen metabarcoding (Sickel et al., 2015; Bell et al., 2017). Our DNA metabarcoding  
166 strategy followed general recommendations by Taberlet et al. (2018). We performed three independent  
167 PCR replicates for each sample. The primer design incorporated 8 bp long tags in both the forward and  
168 reverse primer, which allowed us to tag individual PCR replicates of individual samples by a unique  
169 combination of tags on the forward and reverse primers. The PCR replicates were thus tagged, sequenced  
170 together in a single sequencing library, and analysed separately. We used three types of controls: blanks,  
171 PCR negative controls, and PCR positive controls. We used a mixture of DNA extracts of five exotic  
172 plant species as the PCR positive control. We did the PCR in strips rather than plates to limit cross-  
173 contamination (Kitson et al., 2019). Each strip contained seven samples and one of the controls. In total,  
174 we had 39 blanks, 39 PCR negative controls, and 36 PCR positive controls. The extensive use of different  
175 types of controls allowed us to evaluate different sources of contamination and sequencing errors during  
176 data analysis (De Barba et al., 2014; Taberlet et al., 2018). PCR cycles included an initial period of 3  
177 min at 95°C; followed by 35 cycles of 30 s at 95°C, 30 s at 55°C, and 1 min at 72°C; followed by a  
178 final extension of 10 min at 72°C as in Bell et al. (2017), which seemed to be ideal parameters based  
179 also on our preliminary tests. We verified the success of PCR using gel electrophoresis prior to library  
180 preparation.

181 We pooled equal volume of the PCR product from all samples and purified the resulting amplicon  
182 pool using magnetic beads (Agencourt AMPure PCR purification kit). The final amplicon pool had  
183 a concentration of 52 ng/μl measured by Invitrogen Qubit 3.0 fluorometer (Thermo Fisher Scientific).  
184 Library preparation was done using a PCR-free approach with Illumina adaptors added by ligation at  
185 Fasteris (Switzerland) and the library was sequenced on Illumina HiSeq 2500 Rapid Run, using 1/10 of  
186 the capacity of one sequencing lane resulting in 35,121,401 raw paired reads.

### 187 **Reference plant database**

188 We assembled a detailed reference database of ITS2 sequences of most plant species growing in the  
189 vicinity of the study site. We attempted to obtain an exhaustive list of plant species growing within the  
190 radius of at least 1 km around the study site by our own botanical survey and by extracting data from  
191 the literature, particularly a detailed atlas of plants of the Podyjí National Park (Grulich, 1997) and a  
192 national database of plant records (Wild et al., 2019). We collected tissue samples (usually leaves) of  
193 most entomogamous plant species we could find in the field and identify reliably and dried them with  
194 silica gel. We used the DNEasy Plant Mini Kit (Qiagen) for DNA extraction. We homogenised the leaf  
195 samples in a dry state, i.e. without adding the buffer prior to homogenisation. We used the same primers  
196 and PCR conditions as for the pollen samples described above. The PCR products were sequenced using  
197 Sanger sequencing by MacroGen Europe (Netherlands).

198 We complemented our database by ITS2 sequences from GenBank for those plant species we did not  
199 sample in the field. We searched for ITS2 sequences of individual plant species and carefully verified  
200 the reliability of records for each species to prevent errors from creeping into our reference database.  
201 We aligned the sequences in Geneious using the Geneious Aligner and resolved instances of suspected  
202 errors on a case by case basis, particularly by checking the sources of the sequences (data from papers by  
203 taxonomists were deemed more reliable than data from ecological surveys, samples from geographically  
204 close locations were deemed more relevant, etc.). Public DNA databases are known to contain numerous  
205 misidentified records and other types of errors (Bridge et al., 2003). Limiting their impact on our analyses  
206 was thus important for confidence in our results.

## 207 **Data analysis**

208 We used the Obitools software (Boyer et al., 2016) for bioinformatic processing of the metabarcoding data  
209 following general recommendations for filtering and cleaning the sequence data according to De Barba  
210 et al. (2014) and Taberlet et al. (2018). We first merged the forward and reverse reads and removed  
211 low-quality reads with  $\text{score} < 40$  or  $\text{score\_norm} < 3.9$ . We then assigned the reads to samples (keeping the  
212 three PCR replicates per sample separate) based on the tag sequences and removed reads shorter than  
213 100 bp, based on available data on the length of the ITS2 region in vascular plants (Chen et al., 2010).  
214 We then dereplicated the reads to obtain the list of unique sequences and their abundance in each sample  
215 and PCR replicate. We examined results for the blanks and found that the number of reads in blanks  
216 ranged from 0 to 4, so we conservatively discarded all sequences with  $\leq 5$  reads for each individual  
217 sample/PCR replicate to remove sequencing errors caused by tag jumps (De Barba et al., 2014). We then  
218 proceeded with sequence identification.

219 We used our reference database to identify the ITS2 sequences from the samples. We used the *ecotag*  
220 function in Obitools to compare each unique ITS2 sequence from the samples with sequences in the  
221 reference database. Sequences were identified at the species or genus level with 0.95 as the minimum  
222 sequence similarity threshold for taxonomic assignment. To account for possible incompleteness of our  
223 reference database, we examined unidentified sequences and attempted to identify them using BLAST  
224 search of the GenBank nucleotide database (<https://blast.ncbi.nlm.nih.gov/>). We found only a few  
225 sequences with low read count not matching data from our reference database which could be identified  
226 using BLAST. We updated our reference database with these sequences after verifying that the species  
227 concerned are known to occur in the wider area around our study site according to botanical records  
228 (Grulich, 1997; Wild et al., 2019) or could plausibly occur there. We then reran the sequence identification  
229 procedure with the updated reference database. The final outcome of species identification was the number  
230 of reads per species (or genus) for each sample and PCR replicate.

231 The next step was a comparison of the three independent PCR replicates for each sample to identify  
232 potentially failed or otherwise unreliable PCR replicates (Taberlet et al., 2018). We calculated the pairwise  
233 overlap of the similarity of the plant species composition for all three combinations of the three PCR  
234 replicates for each sample using Pianka's overlap index (Pianka, 1973) calculated using the EcoSimR  
235 library (Gotelli et al., 2015) in R 4.0.2 (R Core Team, 2020). The vast majority of comparisons had overlap  
236  $> 0.99$  and the smallest value of an overlap between any two PCR replicates of the same sample was  
237 0.94 in samples from the nests and 0.97 in samples from the bodies of foraging females, indicating that  
238 different PCR replicates of the same sample gave highly consistent results in all cases. We then averaged  
239 the proportions of reads in the three PCR replicates for each sample for the downstream analyses.

240 Statistical analyses of the data were done in R 4.0.2 (R Core Team, 2020). We used the Pianka's  
241 overlap index (Pianka, 1973) as a measure of similarity in pollen composition among nests, brood cells,  
242 and samples from individual foraging trips. To analyse interspecific resource partitioning, we used  
243 non-metric multidimensional scaling (NMDS) in two dimensions and ANOSIM - a permutational analysis  
244 of similarity (Clarke, 1993), both implemented in the vegan library for R (Oksanen et al., 2019), using  
245 Pianka's overlap index as a measure of similarity in pollen composition among the three *Ceratina* species.  
246 For the analysis of pollen from the nests, we averaged the proportion of reads per plant species across all  
247 brood cells in each nest and we analogously aggregated repeated samples of pollen from the bodies of  
248 individual females. These aggregated data were used in NMDS and ANOSIM. We also used generalised  
249 linear models (GLM) to compare the values of Shannon's  $H'$  index and its components, i.e. the number of  
250 plant species and evenness, among nests of the three *Ceratina* species. We included estimated nest age  
251 (average age of the brood cells based on the developmental stage) as a covariate to account for possible  
252 phenological shifts. We used Gaussian error distribution in the analysis of Shannon's  $H'$  index and  
253 evenness and overdispersed Poisson distribution (quasipoisson) for the number of plant species. We used  
254 analogously constructed generalised linear mixed models (GLMM) to analyse these data at the level of  
255 individual brood cells, where the nest ID was used as a factor with random effect.

256 Additional analyses focused on within-individual and between-individual variation in foraging. We  
257 used repeatability analysis (Nakagawa and Schielzeth, 2010) to evaluate individual-level differences in  
258 specialisation and foraging preferences. Specifically, this analysis compared variation in the Shannon's  $H'$   
259 index and its components, the number of plant species and evenness, among pollen samples from brood  
260 cells from the same nest and among different nests, separately for each of the three *Ceratina* species. We  
261 analogously analysed data from pollen samples taken from the bodies of foraging females. To calculate

262 repeatability, we used GLMM fitted by Markov chain Monte Carlo (MCMC), which provides reliable  
263 variance estimates, in rptR library for R (Schielzeth and Nakagawa, 2013). We used a GLMM with  
264 Gaussian error distribution for Shannon's H' index and evenness and Poisson distribution for the number  
265 of plant species. We also evaluated individual-level variation in the composition of the pollen samples  
266 using partial Mantel tests implemented in the vegan library for R (Oksanen et al., 2019). For pollen  
267 data from the nests, we constructed a dissimilarity matrix based on the overlap of the composition of  
268 the samples among all combinations of the brood cells across all nests of the same species. Another  
269 dissimilarity matrix contained the differences in estimated cell age. We then used a partial Mantel test  
270 (Pearson's correlation, 9999 permutations) to test whether the dissimilarity of pollen composition among  
271 brood cells from the same nest differed from the dissimilarity of pollen composition among brood cells  
272 from different nests, conditioned on differences in estimated brood cell age. We did this analysis separately  
273 for each of the three *Ceratina* species. We did the same type of analysis with data on the composition of  
274 pollen samples obtained from the bodies of foraging females.

## 275 RESULTS

276 Most pollen sequences were identified at the species level, with a few exceptions, e.g. *Rubus* sp. and  
277 *Hypericum* sp., where we achieved genus-level identification. Specifically, 90.9% of reads after quality  
278 filtering in samples from the nests of *Ceratina* spp. were identified at the species level, while 9.1% of  
279 reads were identified at the genus level and a mere 0.03% remained unidentified. In samples from the  
280 bodies of *Ceratina* females, 92.2% of reads after quality filtering were identified at the species level, 7.8%  
281 at the genus level and 0.01% were unidentified.

### 282 Interspecific resource partitioning

283 We found clear interspecific differences in pollen composition in nests from the three *Ceratina* species as  
284 well as interspecific differences in their level of specialisation. Overall pollen composition in nests of the  
285 three *Ceratina* species, expressed as the mean proportion of reads identified as individual plant species,  
286 is summarised in Fig. 1. Nests of *C. chalybea* and the other two species were separated by a NMDS  
287 analysis in two dimensions (Fig. 2), while pollen composition in nests of *C. cucurbitina* overlapped with  
288 *C. nigrolabiata*. Notably, there was also a much higher spread among individual nests in *C. chalybea*  
289 and *C. nigrolabiata* compared to *C. cucurbitina*, see Fig. 2, but this could be partly a consequence of a  
290 lower number of observations for *C. cucurbitina*. Differences in pollen composition from nests of the  
291 three *Ceratina* species were strongly supported by ANOSIM, a permutational analysis of similarity, using  
292 Pianka's overlap index as a measure of similarity in pollen composition ( $R = 0.385, P < 0.0001$ , 9999  
293 permutations).

294 Pollen composition in samples collected four weeks later from the bodies of female bees when  
295 returning from a foraging trip to the nest shows patterns consistent with data on pollen composition from  
296 the nests (Fig. 1 and Fig. 2). Samples from *C. chalybea* were again separated from the other two species  
297 by a NMDS analysis (Fig. 2). Differences in pollen composition of samples from bodies of the three  
298 *Ceratina* species were also strongly supported by ANOSIM ( $R = 0.197, P = 0.002$ , 9999 permutations).

299 We observed interspecific differences in pollen diversity (Fig. 3) measured by the Shannon's H'  
300 index at the level of entire nests (GLM,  $F_{2,63} = 3.41, P = 0.040$ ) and to a limited degree at the level of  
301 individual brood cells (GLMM,  $\chi^2_2 = 5.01, P = 0.082$ ). Of the two components of the Shannon's H'  
302 index, i.e. the number of plant species in a sample and evenness of species composition, only the later  
303 differed among the three *Ceratina* species. There was little evidence for interspecific differences in the  
304 number of plant species per nest (GLM,  $F_{2,63} = 1.35, P = 0.268$ ) or in individual brood cells (GLMM,  
305  $\chi^2_2 = 0.32, P = 0.853$ ). On the other hand, we found clear differences in evenness among the three species  
306 at the level of nests (GLM,  $F_{2,63} = 4.54, P = 0.015$ ) as well as brood cells (GLMM,  $\chi^2_2 = 8.82, P = 0.012$ ),  
307 see Fig. 3. Data on pollen diversity in samples collected from the bodies of female *Ceratina*, i.e. pollen  
308 collected during a single foraging trip, showed no significant differences among the three species (Fig. 3).

### 309 Individual-level differences in specialisation and foraging preferences

310 Females of all three *Ceratina* species showed consistent individual-level differences in their level of  
311 specialisation when collecting pollen (Table 1). We found high levels of repeatability of the Shannon's  
312 H index of pollen samples in brood cells from individual nests in all three species (median 0.47-0.70),  
313 i.e. brood cells in some nests had consistently higher pollen diversity than brood cells in other nests of

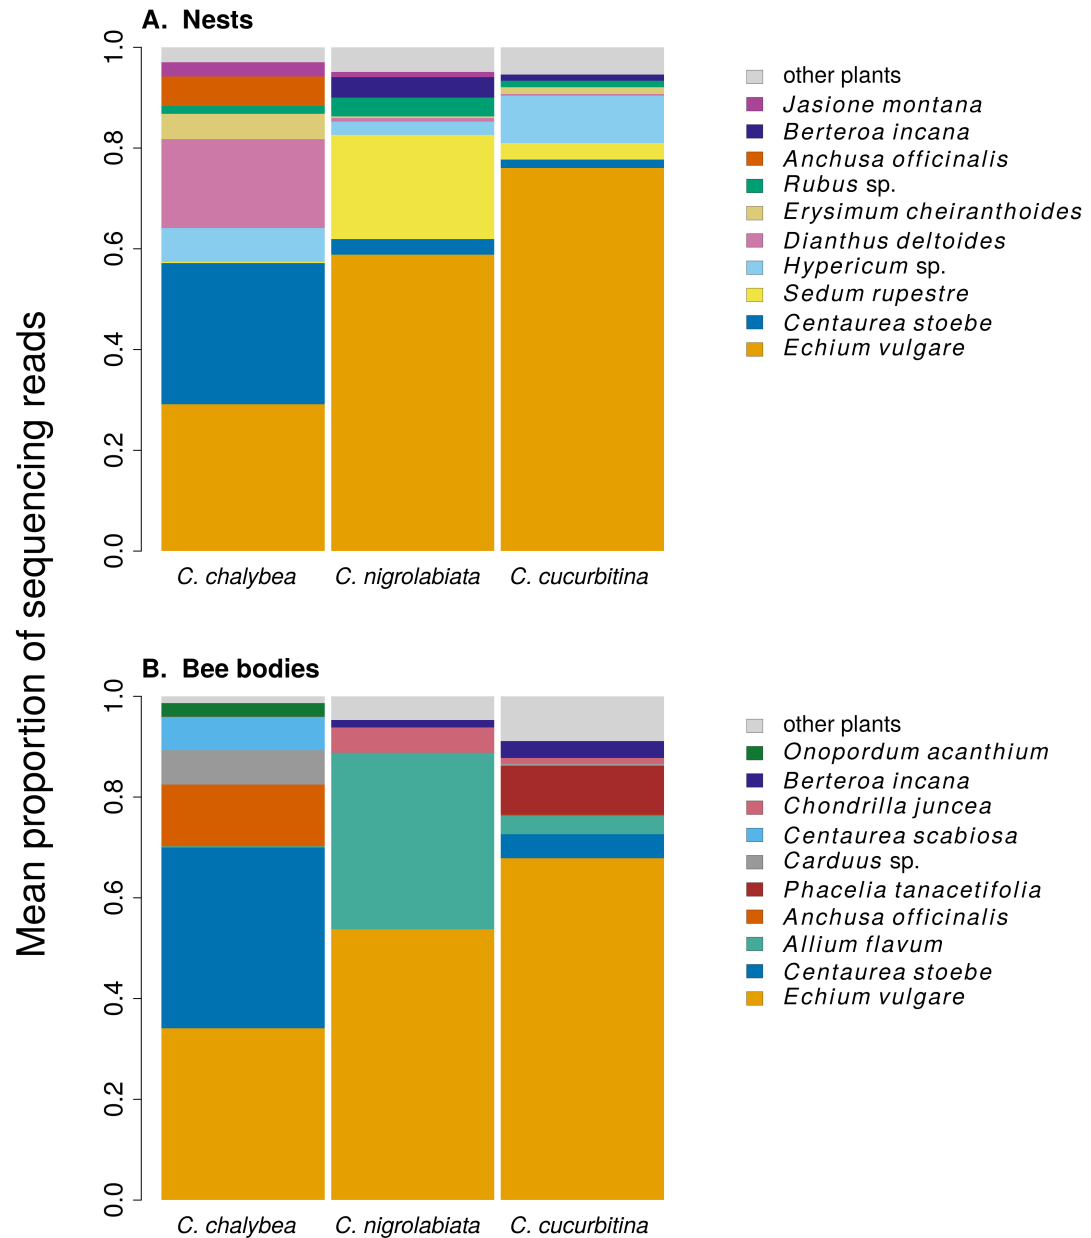

**Figure 1. Overall pollen composition of samples from nests and bodies of the three *Ceratina* species.** The composition of pollen samples from the nests (A.) and samples collected from the bodies (B.) of females of individual species was calculated as the mean proportion of reads assigned to individual plant species. Plant species are sorted from the bottom up according to their total number of reads in samples from all three *Ceratina* species. Ten species with the highest numbers of reads in samples from the nests (A.) and females bodies (B.) are distinguished by colours, the remaining species are pooled and shown in light grey for clarity.

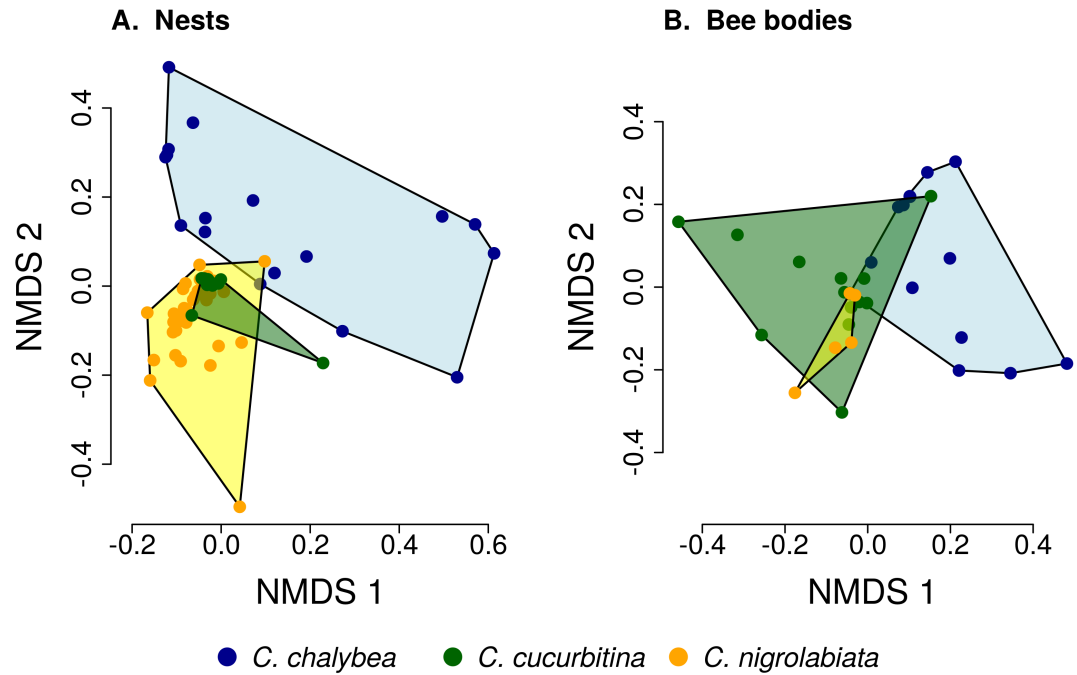

**Figure 2. Similarity of pollen composition in individual nests within and among the three *Ceratina* species.** Results of Non-metric Multidimensional Scaling (NMDS) showing the similarity of pollen composition of samples from individual nests (A.) and bodies of individual female bees (B.) in two dimensions. The polygons delimit the area containing samples from nests or female bee bodies of individual *Ceratina* species. The position of nests or individual bees is shown by coloured points.

314 the same species. Among the two components of the diversity index (Shannon's H), evenness was more  
315 strongly repeatable than the number of plant species per brood cell, which had high repeatability only in  
316 *C. chalybea* (Table 1).

317 We also found high repeatability of the Shannon's H and evenness in pollen repeatedly sampled from  
318 the bodies of individual females returning from a foraging trip (Table 1). We note that 50% of individuals  
319 were recaptured on the same day and 50% on multiple different days in *C. chalybea* as well as in *C.*  
320 *cucurbitina*. Only a single *C. nigrolabiata* was recaptured twice, while other individuals were captured  
321 only once, so we had to exclude *C. nigrolabiata* from analyses on individual-level differences, because  
322 they require repeated sampling of the same individuals.

323 Individual females of *C. chalybea* and *C. nigrolabiata*, but not *C. cucurbitina*, showed consistent  
324 individual-level differences in the composition of pollen contained in brood cells in their nests according  
325 to partial Mantel tests conditioned on the temporal distance of the samples (estimated age of brood cells).  
326 Similarity in pollen composition between brood cells from the same nest compared to brood cells from  
327 different nests was stronger in *C. chalybea* ( $r = 0.20, P < 0.0001$ ) than in *C. nigrolabiata* ( $r = 0.042, P <$   
328  $0.0001$ ), and negligible in *C. cucurbitina* ( $r = 0.029, P = 0.104$ ), based on 9999 permutations in all cases  
329 (Fig. 4). Partial Mantel test accounted for differences in the age of different nests, i.e. changes due to  
330 phenology. Indeed, pairs of brood cells with larger differences in their estimated age had more dissimilar  
331 pollen composition in all three species (partial Mantel test of the dependence of the dissimilarity of  
332 pollen composition on the difference in brood cell age conditioned on whether the pairwise brood cell  
333 combination came from the same or different nests, 9999 permutations): *C. chalybea* ( $r = 0.234, P =$   
334  $0.0031$ ), *C. nigrolabiata* ( $r = 0.151, P = 0.0006$ ), and *C. cucurbitina* ( $r = 0.424, P < 0.0001$ ).

335 Similarly to data from the nests, we found consistent individual-level differences in the composition  
336 of pollen sampled directly from bodies of repeatedly captured females of *C. chalybea* returning from a  
337 foraging trip (partial Mantel test,  $r = 0.460, P = 0.0006$ , 9999 permutations), but not in *C. cucurbitina*  
338 ( $r = 0.071, P = 0.084$ ). There was no effect of temporal distance (the number of days between collecting  
339 the samples) on similarity of pollen composition in both *C. chalybea* ( $r = -0.236, P = 0.999$ ) and



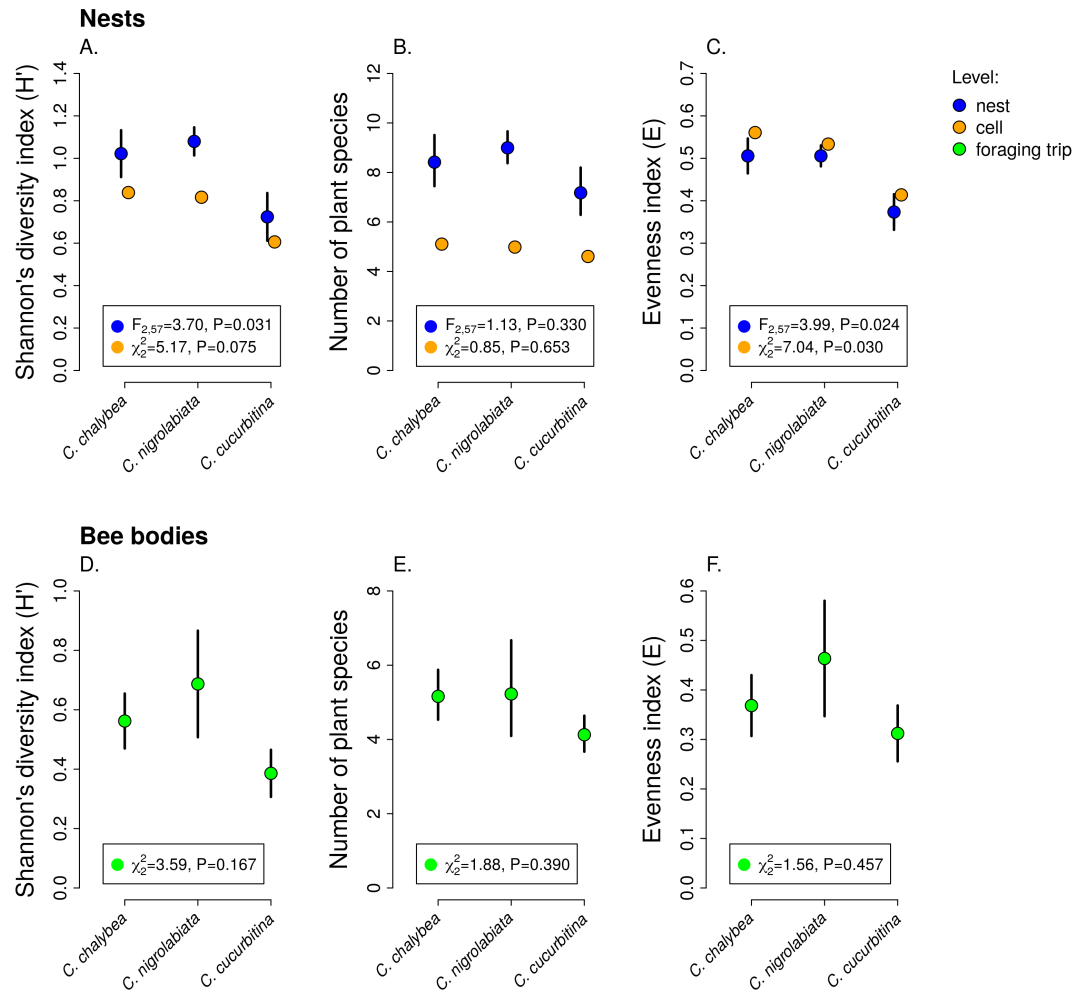

**Figure 3. Pollen diversity of samples at the level of nests, brood cells, and individual foraging bouts.** Shannon's diversity index, plant species richness, and evenness ( $mean \pm SE$ ) calculated from the proportions of reads identified as individual plant species at the level of individual nests and individual brood cells for the three *Ceratina* species (A.-C.) and for individual foraging bouts (D.-F.). The  $F$  and  $P$  values refer to the results of GLM and the  $\chi^2$  and  $P$  values refer to the results of GLMM (see Methods and Results).

340 *C. cucurbitina* ( $r = -0.006, P = 0.446$ ) (partial Mantel test conditioned on whether pairwise sample  
 341 combination came from the same or different individual, 9999 permutations). That means that similarity  
 342 in the composition of pollen collected from the same individual did not depend on whether the individual  
 343 was recaptured the same day or several days apart.

|                               | <i>C. chalybea</i>         | <i>C. nigrolabiata</i>     | <i>C. cucurbitina</i>      |
|-------------------------------|----------------------------|----------------------------|----------------------------|
| <b>Nests</b>                  |                            |                            |                            |
| Diversity index (Shannon's H) | <b>0.77</b> [0.489, 0.878] | <b>0.45</b> [0.273, 0.623] | <b>0.54</b> [0.280, 0.816] |
| Species richness              | <b>0.53</b> [0.244, 0.764] | 0.001 [0, 0.171]           | 0.28 [0, 0.583]            |
| Evenness index (E)            | <b>0.36</b> [0.204, 0.648] | <b>0.36</b> [0.203, 0.517] | <b>0.37</b> [0.197, 0.700] |
| <b>Bee bodies</b>             |                            |                            |                            |
| Diversity index (Shannon's H) | <b>0.46</b> [0.118, 0.750] | NA                         | <b>0.29</b> [0.058, 0.597] |
| Species richness              | 0.002 [0, 0.509]           | NA                         | 0.004 [0, 0.593]           |
| Evenness index (E)            | <b>0.50</b> [0.191, 0.767] | NA                         | <b>0.64</b> [0.226, 0.835] |

**Table 1. Repeatability analysis shows consistent differences among individuals in measures of foraging specialisation.** Results of tests of repeatability of pollen diversity in individual females of the three *Ceratina* species are reported. Mean values of repeatability and 95% credible intervals are reported. Values of repeatability significantly larger than zero (shown in bold) mean that variance of Shannon's H', plant species richness, or evenness of pollen composition in brood cells within the same nest (or repeated samples from the body of the same female) was significantly smaller than variance among different nests (or bodies of different females) - this is evidence of consistent among-individual differences. The number of samples from the bodies of *C. nigrolabiata* was not sufficient for analysis.

## 344 DISCUSSION

### 345 Individual-level consistency and among-individual variation in specialisation and foraging prefer- 346 ences

347 In this study, we tested how diet breadth and selectivity of three co-occurring species of bees foraging for  
 348 pollen varies across various levels of aggregation from a single foraging bout, through an individual's  
 349 lifetime, to the population and species level. We found that the females of all three species displayed  
 350 consistent among-individual differences in foraging specialisation at the short temporal scale of individual  
 351 foraging bouts as well as at a longer temporal scale represented by pollen provisions accumulated in brood  
 352 cells in their nests. Moreover, larger among-individual differences at the intraspecific level translated into  
 353 lower specialisation at the species level. Individuals of the more generalised species (*C. chalybea* and to a  
 354 lesser extent *C. nigrolabiata*) displayed significant among-individual differences in foraging preferences  
 355 and had larger within-individual variation. On the other hand, individuals of the most specialised species  
 356 (*C. cucurbitina*) were extremely consistent in their foraging preferences both at the within-individual and  
 357 among-individual level. Differences in foraging strategies of the three species imply that they may play  
 358 different functional roles in the local plant-pollinator network.

359 Our data thus support the conceptual scheme of varying levels of specialisation at different levels  
 360 of aggregation presented by Brosi (2016) based on earlier studies on individual-level variation of diet  
 361 breadth in various consumers (Bolnick et al., 2003; Araújo et al., 2011). As predicted, we found that  
 362 the three species of solitary bees of the genus *Ceratina* were more specialised at the level of individual  
 363 foraging bouts than over longer time scales, based on a comparison of pollen diversity in samples from  
 364 single foraging trips, pollen provisions in individual brood cells accumulated over a few days, and  
 365 pollen aggregated in entire nests collected by a single female over the period of many days, see also  
 366 Kobayashi-Kidokoro and Higashi (2010). Moreover, we found consistent among-individual differences in  
 367 their specialisation and foraging preferences. Hence, some individuals were consistently more specialised  
 368 than other individuals of the same species (repeatability analysis; Table 1) and they foraged on a different  
 369 set of plant species (Fig. 4). Our study thus provides unambiguous evidence of consistent individual-level  
 370 specialisation in pollinators following early observations by (Heinrich, 1976) in bumblebees and recent  
 371 evidence in butterflies (Szigeti et al., 2019).

372 At the species level, we found a clear distinction in the level of specialisation and foraging preferences  
 373 among the three *Ceratina* species. *C. chalybea* and *C. nigrolabiata* were more generalised than *C.*

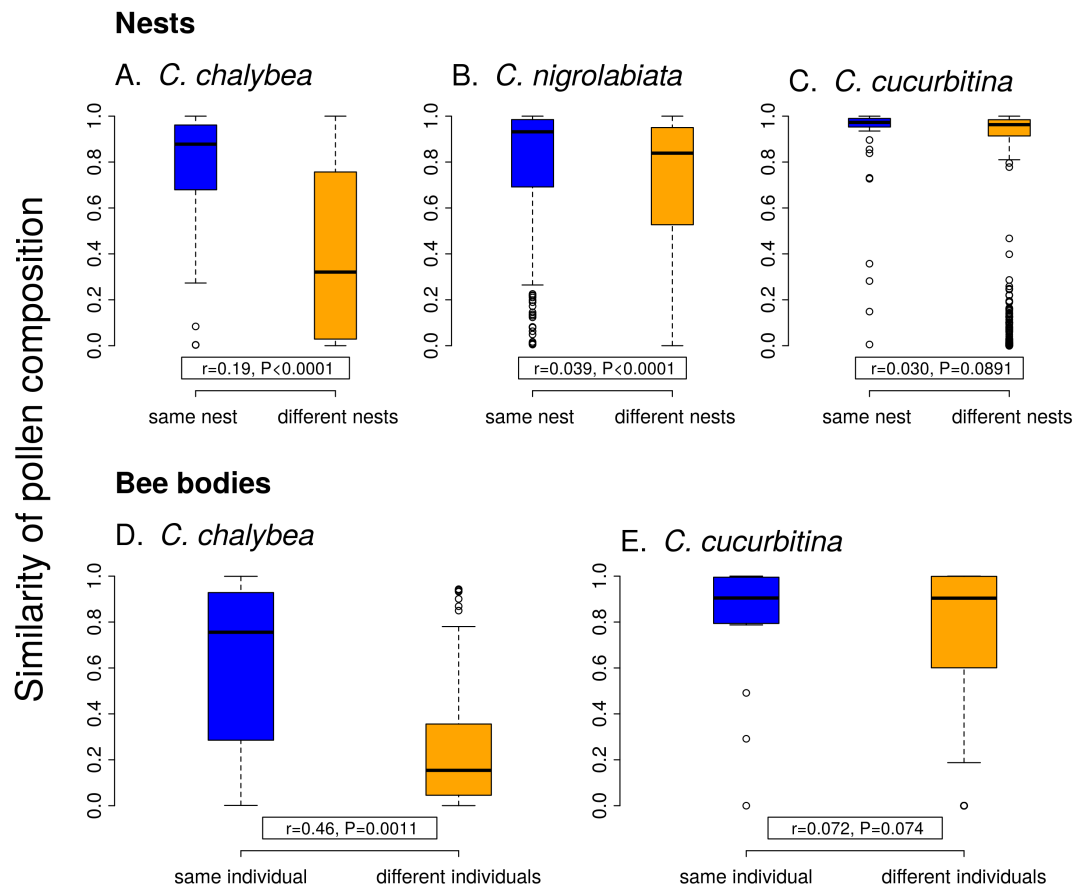

**Figure 4. Within-individual and between-individual variation in pollen composition.** Higher similarity of pollen composition (Pianka's overlap index) between brood cells from the same nest compared to brood cells from different nests (A.-C.) indicates consistent differences in foraging preferences among individual females. Similarity in pollen composition is analogously compared between repeated samples from the bodies of foraging females (D.-E.). The number of samples from bodies of *C. nigrolabiata* was not sufficient for analysis. Median and interquartile range is shown in the boxplots. The  $r$  and  $P$  values refer to the results of partial Mantel tests (see Methods and Results).

374 *cucurbitina*. These differences stem mostly from varying strength of among-individual differences at the  
375 intraspecific level (Fig. 4). While we observed large differences in pollen composition among different  
376 individuals of *C. chalybea*, among-individual differences were smaller in *C. nigrolabiata* and virtually  
377 absent in *C. cucurbitina*, where all individuals were extremely consistent in their specialisation and  
378 foraging preferences. Hence, we detected large differences in specialisation among the three species at  
379 the aggregated species level despite the relatively small and statistically insignificant differences among  
380 the three species in specialisation at the level of individual foraging bouts. Higher generalisation at the  
381 species level thus stemmed from larger among-individual variation in diets as observed in other types of  
382 consumers, such as predators (Bolnick et al., 2003; Araújo et al., 2011).

383 Interestingly, *C. nigrolabiata* has a longer duration of foraging trips compared to the other two species,  
384 likely because it has biparental care and the male guards the nest while the female is foraging (Mikát et al.,  
385 2019). Lower time constraints on foraging could promote specialisation on the most rewarding resources  
386 (Lucas, 1983), but we observed a similar level of specialisation in the three species during single foraging  
387 bouts. This may be driven by the same balance of energetic costs and benefits of selective feeding in all  
388 three species (Emlen, 1966; Grüter and Ratnieks, 2011). In contrast, two closely related honeybee species,  
389 *Apis cerana* and *A. mellifera*, differ in their levels of flower constancy according to Wells and Rathore  
390 (1994). However, we detected differences in individual-level consistency over a longer time scale among  
391 the three *Ceratina* species, despite the fact that they were studied at the same site and exposed to the same  
392 abundance and composition of resources. These differences may stem from different nutritional demands  
393 of the larvae or different levels of foraging flexibility in the three species (Grüter and Ratnieks, 2011).

394 We also conclude that there was a certain level of resource partitioning among the three *Ceratina*  
395 species. While pollen from e.g. *Echium vulgare* was found in pollen provisions of all three species, many  
396 plant species were found exclusively in pollen provisions of only one or two of the three *Ceratina* species.  
397 For example, pollen of *Centaurea stoebe* and *Dianthus deltoides* was common in the samples from *C.*  
398 *chalybea* but almost absent in samples from the other two *Ceratina* species, where it was replaced by  
399 pollen of *Sedum rupestre*, *Alium flavum*, and other plants. Such pattern of resource partitioning could  
400 be caused by different preferences for floral traits (Junker et al., 2013; Klecka et al., 2018a), variation in  
401 preferred plant height (Klecka et al., 2018b), or by interspecific competition (Schoener, 1974; Palmer  
402 et al., 2003), as demonstrated previously in bumblebees (Inouye, 1978; Graham and Jones, 1996).

403 An interesting fact is that pollen of *Echium vulgare* was the dominant source of pollen for all three  
404 *Ceratina* species, based on the proportion of sequencing reads. The pollen of *E. vulgare* has a very high  
405 protein content (35% crude protein in the dry matter according to Somerville and Nicol (2006)), which  
406 makes it a potentially excellent resource for bees, but it contains high concentrations of pyrrolizidine  
407 alkaloids (Boppré et al., 2008; Lucchetti et al., 2016; Trunz et al., 2020) toxic to insects (Narberhaus et al.,  
408 2005; Macel, 2011). Only a restricted range of solitary bee species can successfully develop on the pollen  
409 of *E. vulgare* (Praz et al., 2008; Sedivy et al., 2011; Trunz et al., 2020). In particular, some species of the  
410 genus *Hoplitis* (Hymenoptera: Megachilidae) are specialised on *Echium* and other plants in the family  
411 Boraginaceae (Sedivy et al., 2013), which are also known to contain pyrrolizidine alkaloids (El-Shazly  
412 et al., 1998; El-Shazly and Wink, 2014; Trunz et al., 2020). Our results suggest that the three species of  
413 *Ceratina* we studied also have physiological adaptations to develop on the pollen of *E. vulgare*, which  
414 allows them to utilise its protein-rich pollen Somerville and Nicol (2006).

## 415 **Implications of variation in specialisation and foraging preferences across individuals and tempo-** 416 **ral scales**

417 Foraging behaviour of flower visitors has important consequences for reproduction of entomophilous  
418 plants. From the plant's perspective, high level of specialisation of its pollinators intuitively seems  
419 desirable. Specialised pollinators may be more effective than generalists, i.e. they provide higher single  
420 visit contribution to plant reproductive fitness (Larsson, 2005; McIntosh, 2005), although e.g. specialised  
421 solitary bees often remove more pollen per flower visit than generalists, which increases the costs for  
422 the plants (Larsson, 2005; Parker et al., 2016). However, it is important to emphasise that specialisation  
423 specifically at the level of individual foraging bouts, i.e. high flower constancy, matters for pollination  
424 because it ensures that pollen is transferred between flowers of the same plant species (Brosi, 2016) and  
425 it minimises heterospecific pollen transfer which may decrease both the male fitness of the donor plant  
426 and the female fitness of the recipient plant (Waser, 1978; Morales and Traveset, 2008). Hence, even a  
427 flower visitor which is generalised at a longer temporal scale (e.g. during its lifetime), may be a highly

428 efficient pollinator if it temporarily specialises on a single plant species during a foraging bout (Brosi,  
429 2016; Szigeti et al., 2019). This suggests that pollination efficiency of the three *Ceratina* species we  
430 studied may be similar despite their large differences in specialisation at the species level, because they  
431 had a comparably high level of specialisation during individual foraging bouts.

432 Despite the varying level of specialisation, individual brood cells always contained a mixture of pollen  
433 of several plant species, which is in line with data on other *Ceratina* species (Kobayashi-Kidokoro and  
434 Higashi, 2010; Lawson et al., 2016; McFrederick and Rehan, 2016). The effect of the composition of  
435 pollen provisions on the larval development and survival is not straightforward (Nicholls and Hempel de  
436 Ibarra, 2017). It has been demonstrated that higher protein content provides benefits for larval development  
437 with positive effects persisting to adulthood (Roulston and Cane, 2002; Li et al., 2012). Accordingly,  
438 the most utilised plant by *Ceratina* in our study was *Echium vulgare*, whose pollen is one of the most  
439 protein-rich among all plants Roulston and Cane (2000); Somerville and Nicol (2006). However, pollen  
440 from different plants varies widely not only in protein content, but also in energetic value, lipid contents,  
441 etc. (Roulston and Cane, 2000; Somerville and Nicol, 2006; Brodschneider and Crailsheim, 2010; Vaudo  
442 et al., 2020). A mixed diet thus may be beneficial for larval development (Eckhardt et al., 2014), because  
443 it could either better satisfy their nutritional needs or dilute toxins present in some of the food sources  
444 (Lefcheck et al., 2013; Eckhardt et al., 2014; Vaudo et al., 2016). Although we still know little about the  
445 importance of resource diversity for the nutrition of solitary bees, it seems that restricted plant diversity  
446 caused by climate change or land use change may have a detrimental effect not only on specialised but  
447 also on generalised pollinators by affecting their nutrition (Vaudo et al., 2016, 2020), which should be  
448 recognised in planning conservation actions (Vaudo et al., 2015).

449 Variation in pollen composition among nests built by different females and even among brood cells  
450 in the same nest could lead to differences in the growth and traits of the developing larvae. At the  
451 intraspecific level, variation in pollen provisions among nests is an example of maternal effects (Bernardo,  
452 1996): the development and traits of the offspring may be driven by individual foraging preferences of  
453 their mother. This way, among-individual variation in foraging preferences may promote phenotypic  
454 plasticity in the next generation, which may affect evolutionary changes in the solitary bees (Räsänen  
455 and Kruuk, 2007). At an even finer level, variation in pollen composition among brood cells in the same  
456 nest could play an important role in the evolution of eusociality in bees - maternal manipulation of the  
457 provisions is known to affect the development of the offspring leading to the production of workers in a  
458 facultatively eusocial bee *Megalopta genalis* (Halictidae) (Kapheim et al., 2011) and to the production of  
459 a dwarf eldest daughter which acts as a worker in *Ceratina calcarata* in North America (Lawson et al.,  
460 2016). However, there is no evidence of such maternal manipulation in the three species we studied  
461 (Mikát et al., 2020a,b). It is also possible that variation in the composition of the pollen provisions may  
462 affect the development of the larvae not only directly by differences in nutritional value, but also indirectly  
463 by differences in the composition of bacterial communities in the pollen provisions (McFrederick and  
464 Rehan, 2016). We are only beginning to understand such implications of individual foraging behaviour,  
465 so there is a number avenues for future research.

#### 466 **Utility and caveats of the DNA metabarcoding approach**

467 Obtaining such detailed insights was facilitated by the use of a rigorous DNA metabarcoding protocol  
468 with different types of controls and by a creation of a local reference database which allowed us to identify  
469 pollen DNA sequences with high level of precision (Zinger et al., 2019). In our case, >90% of reads were  
470 identified at the species level and almost all the remaining reads at the genus level. This level of precision  
471 is unusual when using ITS2 as a marker for plant identification, because many closely related plant  
472 species cannot be confidently distinguished. Detailed knowledge of the local flora is thus an important  
473 prerequisite for pollen DNA metabarcoding studies where detailed species level data are needed (Biella  
474 et al., 2019b). We could rely on a long tradition of botanical surveys at the study site and its surroundings  
475 (Grulich, 1997) to obtain an exhaustive list of plant species known from the area. However, compiling a  
476 database of ITS2 sequences was still complicated by the high frequency of erroneous or spurious records  
477 in public databases.

478 A caveat of using DNA metabarcoding to analyse the composition of pollen samples is that it is not  
479 entirely quantitative, i.e. the proportion of reads belonging to a plant species is generally not a good  
480 proxy for the pollen mass or the number of pollen grains because of different DNA contents per unit mass,  
481 amplification bias, etc. (Bell et al., 2016). However, the number of pollen grains of individual species per

482 sample correlates positively with the number of sequencing reads (Keller et al., 2015), which suggests that  
483 the proportion of reads may provide at least semi-quantitative information. Importantly, this uncertainty  
484 is problematic for absolute quantification, i.e., we cannot make conclusions about the amount of pollen  
485 collected by the bees based on the number of reads, but it does not invalidate relative comparisons among  
486 samples, which is what we focused on in our analyses.

## 487 CONCLUSIONS

488 In conclusion, we showed that three species of solitary bees of the genus *Ceratina* were more specialised  
489 at the level of individual foraging bouts than over longer time scales. Moreover, we found consistent  
490 among-individual differences in their specialisation and foraging preferences. Hence, some individuals  
491 were consistently more specialised than other individuals of the same species and collected pollen from a  
492 different set of plant species. Our study thus provides evidence of consistent individual-level specialisation  
493 in pollinators. Moreover, higher generalisation at the species level stemmed from larger among-individual  
494 variation in diets as observed in other types of consumers, particularly predators. More detailed knowledge  
495 of specialisation and foraging preferences of pollinators across different spatial and temporal scales, from  
496 an individual foraging bout to the species level, is necessary to understand plant-flower visitor networks  
497 from the functional perspective (Brosi, 2016) and to forecast the consequences of various environmental  
498 changes on the robustness of plant-pollinator networks which is mediated by foraging flexibility of  
499 pollinators (Biella et al., 2019a, 2020).

## 500 ACKNOWLEDGEMENTS

501 We would like to thank Tereza Hadravová, Jitka Waldhauserová, Marcela Dokulilová, Kateřina Čermáková,  
502 Daniela Reiterová, Šimon Zeman, Vojtěch Brož, and Celie Korittová for their help in the field. JK also  
503 thanks Pierre Taberlet, Eric Coissac, and their colleagues for sharing their invaluable expertise during the  
504 seventh DNA metabarcoding Spring School at Porto, Portugal, in May 2017. The study was supported by  
505 the Czech Science Foundation (projects GJ17-24795Y and GA20-14872S).

## 506 DATA AVAILABILITY

507 Raw data are available in Figshare at <https://www.doi.org/10.6084/m9.figshare.13850324>.  
508 DNA sequences of plants generated during this project are available in BOLD and Genbank; their list is  
509 included in Figshare at <https://www.doi.org/10.6084/m9.figshare.13850324>.

## 510 SUPPLEMENTAL INFORMATION

511 Supplemental information is available in Figshare at <https://www.doi.org/10.6084/m9.figshare.13850324>.

## 513 REFERENCES

- 514 Amaya-Márquez, M. (2009). Floral constancy in bees: a revision of theories and a comparison with other  
515 pollinators. *Revista Colombiana de Entomología*, 35(2):206–216.
- 516 Araújo, M. S., Bolnick, D. I., and Layman, C. A. (2011). The ecological causes of individual specialisation.  
517 *Ecology Letters*, 14(9):948–958.
- 518 Bell, K. L., De Vere, N., Keller, A., Richardson, R. T., Gous, A., Burgess, K. S., and Brosi, B. J. (2016).  
519 Pollen DNA barcoding: current applications and future prospects. *Genome*, 59(9):629–640.
- 520 Bell, K. L., Fowler, J., Burgess, K. S., Dobbs, E. K., Gruenewald, D., Lawley, B., Morozumi, C., and  
521 Brosi, B. J. (2017). Applying pollen dna metabarcoding to the study of plant–pollinator interactions.  
522 *Applications in Plant Sciences*, 5(6):1600124.
- 523 Bernardo, J. (1996). Maternal effects in animal ecology. *American Zoologist*, 36(2):83–105.
- 524 Biella, P., Akter, A., Ollerton, J., Nielsen, A., and Klecka, J. (2020). An empirical attack tolerance test  
525 alters the structure and species richness of plant-pollinator networks. *Functional Ecology*, 34(11):2246–  
526 2258.
- 527 Biella, P., Akter, A., Ollerton, J., Tarrant, S., Janeček, Š., Jersáková, J., and Klecka, J. (2019a). Experi-  
528 mental loss of generalist plants reveals alterations in plant-pollinator interactions and a constrained  
529 flexibility of foraging. *Scientific Reports*, 9:7376.

- 530 Biella, P., Tommasi, N., Akter, A., Guzzetti, L., Klecka, J., Sandionigi, A., Labra, M., and Galimberti, A.  
531 (2019b). Foraging strategies are maintained despite workforce reduction: A multidisciplinary survey  
532 on the pollen collected by a social pollinator. *PLoS ONE*, 14(11):e0224037.
- 533 Bolnick, D. I., Amarasekare, P., Araújo, M. S., Bürger, R., Levine, J. M., Novak, M., Rudolf, V. H.,  
534 Schreiber, S. J., Urban, M. C., and Vasseur, D. A. (2011). Why intraspecific trait variation matters in  
535 community ecology. *Trends in Ecology & Evolution*, 26(4):183–192.
- 536 Bolnick, D. I., Svanbäck, R., Araújo, M. S., and Persson, L. (2007). Comparative support for the niche  
537 variation hypothesis that more generalized populations also are more heterogeneous. *Proceedings of*  
538 *the National Academy of Sciences*, 104(24):10075–10079.
- 539 Bolnick, D. I., Svanbäck, R., Fordyce, J. A., Yang, L. H., Davis, J. M., Hulsey, C. D., and Forister, M. L.  
540 (2003). The ecology of individuals: incidence and implications of individual specialization. *American*  
541 *Naturalist*, 161(1):1–28.
- 542 Bolnick, D. I., Yang, L. H., Fordyce, J. A., Davis, J. M., and Svanbäck, R. (2002). Measuring individual-  
543 level resource specialization. *Ecology*, 83(10):2936–2941.
- 544 Boppré, M., Colegate, S. M., Edgar, J. A., and Fischer, O. W. (2008). Hepatotoxic pyrrolizidine alkaloids in  
545 pollen and drying-related implications for commercial processing of bee pollen. *Journal of Agricultural*  
546 *and Food Chemistry*, 56(14):5662–5672.
- 547 Boyer, F., Mercier, C., Bonin, A., Le Bras, Y., Taberlet, P., and Coissac, E. (2016). OBITOOLS: A UNIX-  
548 inspired software package for DNA metabarcoding. *Molecular Ecology Resources*, 16(1):176–182.
- 549 Bridge, P. D., Roberts, P. J., Spooner, B. M., and Panchal, G. (2003). On the unreliability of published  
550 DNA sequences. *New Phytologist*, 160(1):43–48.
- 551 Brodschneider, R. and Crailsheim, K. (2010). Nutrition and health in honey bees. *Apidologie*, 41(3):278–  
552 294.
- 553 Brosi, B. J. (2016). Pollinator specialization: from the individual to the community. *New Phytologist*,  
554 210(4):1190–1194.
- 555 Brosi, B. J. and Briggs, H. M. (2013). Single pollinator species losses reduce floral fidelity and plant  
556 reproductive function. *Proceedings of the National Academy of Sciences*, 110(32):13044–13048.
- 557 Chen, S., Yao, H., Han, J., Liu, C., Song, J., Shi, L., Zhu, Y., Ma, X., Gao, T., Pang, X., et al. (2010).  
558 Validation of the ITS2 region as a novel DNA barcode for identifying medicinal plant species. *PLoS*  
559 *ONE*, 5(1):e8613.
- 560 Clarke, K. R. (1993). Non-parametric multivariate analyses of changes in community structure. *Australian*  
561 *Journal of Ecology*, 18(1):117–143.
- 562 De Barba, M., Miquel, C., Boyer, F., Mercier, C., Rioux, D., Coissac, E., and Taberlet, P. (2014).  
563 DNA metabarcoding multiplexing and validation of data accuracy for diet assessment: application to  
564 omnivorous diet. *Molecular Ecology Resources*, 14(2):306–323.
- 565 Eckhardt, M., Haider, M., Dorn, S., and Müller, A. (2014). Pollen mixing in pollen generalist solitary  
566 bees: a possible strategy to complement or mitigate unfavourable pollen properties? *Journal of Animal*  
567 *Ecology*, 83(3):588–597.
- 568 El-Shazly, A., El-Domiaty, M., Witte, L., and Wink, M. (1998). Pyrrolizidine alkaloids in members of the  
569 Boraginaceae from Sinai (Egypt). *Biochemical Systematics and Ecology*, 26(6):619–636.
- 570 El-Shazly, A. and Wink, M. (2014). Diversity of pyrrolizidine alkaloids in the Boraginaceae structures,  
571 distribution, and biological properties. *Diversity*, 6(2):188–282.
- 572 Emlen, J. M. (1966). The role of time and energy in food preference. *American Naturalist*, 100(916):611–  
573 617.
- 574 Fontaine, C., Collin, C. L., and Dajoz, I. (2008). Generalist foraging of pollinators: diet expansion at high  
575 density. *Journal of Ecology*, 96(5):1002–1010.
- 576 Forsman, A. and Wennersten, L. (2016). Inter-individual variation promotes ecological success of  
577 populations and species: Evidence from experimental and comparative studies. *Ecography*, 39(7):630–  
578 648.
- 579 Gegear, R. and Laverly, T. (1998). How many flower types can bumble bees work at the same time?  
580 *Canadian Journal of Zoology*, 76(7):1358–1365.
- 581 Gotelli, N. J., Hart, E. M., and Ellison, A. M. (2015). *EcoSimR: Null model analysis for ecological data*.  
582 R package version 0.1.0.
- 583 Goulson, D. and Wright, N. P. (1998). Flower constancy in the hoverflies *Episyrphus balteatus* (Degeer)  
584 and *Syrphus ribesii* (L.)(Syrphidae). *Behavioral Ecology*, 9(3):213–219.

- 585 Graham, L. and Jones, K. N. (1996). Resource partitioning and per-flower foraging efficiency in two  
586 bumble bee species. *American Midland Naturalist*, 136(2):401–406.
- 587 Groom, S. V. and Rehan, S. M. (2018). Climate-mediated behavioural variability in facultatively social  
588 bees. *Biological Journal of the Linnean Society*, 125(1):165–170.
- 589 Grulich, V. (1997). *Atlas rozšíření cévnatých rostlin Národního parku Podyjí*. Masaryk University, Brno,  
590 Czech Republic.
- 591 Grüter, C. and Ratnieks, F. L. (2011). Flower constancy in insect pollinators: Adaptive foraging behaviour  
592 or cognitive limitation? *Communicative & Integrative Biology*, 4(6):633–636.
- 593 Heinrich, B. (1976). The foraging specializations of individual bumblebees. *Ecological Monographs*,  
594 46(2):105–128.
- 595 Hofstede, F. E. and Sommeijer, M. J. (2006). Effect of food availability on individual foraging specialisa-  
596 tion in the stingless bee *Plebeia tobagoensis* (Hymenoptera, Meliponini). *Apidologie*, 37(3):387–397.
- 597 Inouye, D. W. (1978). Resource partitioning in bumblebees: experimental studies of foraging behavior.  
598 *Ecology*, 59(4):672–678.
- 599 Junker, R. R., Blüthgen, N., Brehm, T., Binkenstein, J., Paulus, J., Schaefer, M. H., and Stang, M. (2013).  
600 Specialization on traits as basis for the niche-breadth of flower visitors and as structuring mechanism  
601 of ecological networks. *Functional Ecology*, 27(2):329–341.
- 602 Kapheim, K. M., Bernal, S. P., Smith, A. R., Nonacs, P., and Wcislo, W. T. (2011). Support for maternal  
603 manipulation of developmental nutrition in a facultatively eusocial bee, *Megalopta genalis* (Halictidae).  
604 *Behavioral Ecology and Sociobiology*, 65(6):1179–1190.
- 605 Keller, A., Danner, N., Grimmer, G., Ankenbrand, M, v. d., Von Der Ohe, K., Von Der Ohe, W., Rost, S.,  
606 Härtel, S., and Steffan-Dewenter, I. (2015). Evaluating multiplexed next-generation sequencing as a  
607 method in palynology for mixed pollen samples. *Plant Biology*, 17(2):558–566.
- 608 Kitson, J. J., Hahn, C., Sands, R. J., Straw, N. A., Evans, D. M., and Lunt, D. H. (2019). Detecting  
609 host–parasitoid interactions in an invasive lepidopteran using nested tagging DNA metabarcoding.  
610 *Molecular Ecology*, 28(2):471–483.
- 611 Klecka, J., Hadrava, J., Biella, P., and Akter, A. (2018a). Flower visitation by hoverflies (Diptera:  
612 Syrphidae) in a temperate plant-pollinator network. *PeerJ*, 6:e6025.
- 613 Klecka, J., Hadrava, J., and Koloušková, P. (2018b). Vertical stratification of plant–pollinator interactions  
614 in a temperate grassland. *PeerJ*, 6:e4998.
- 615 Kobayashi-Kidokoro, M. and Higashi, S. (2010). Flower constancy in the generalist pollinator *Ceratina*  
616 *flavipes* (Hymenoptera: Apidae): an evaluation by pollen analysis. *Psyche*, 2010:891906.
- 617 Larsson, M. (2005). Higher pollinator effectiveness by specialist than generalist flower-visitors of  
618 unspecialized *Knautia arvensis* (Dipsacaceae). *Oecologia*, 146(3):394–403.
- 619 Lawson, S. P., Ciaccio, K. N., and Rehan, S. M. (2016). Maternal manipulation of pollen provisions affects  
620 worker production in a small carpenter bee. *Behavioral Ecology and Sociobiology*, 70(11):1891–1900.
- 621 Lefcheck, J. S., Whalen, M. A., Davenport, T. M., Stone, J. P., and Duffy, J. E. (2013). Physiological  
622 effects of diet mixing on consumer fitness: a meta-analysis. *Ecology*, 94(3):565–572.
- 623 Lewis, A. C. (1986). Memory constraints and flower choice in *Pieris rapae*. *Science*, 232(4752):863–865.
- 624 Li, C., Xu, B., Wang, Y., Feng, Q., and Yang, W. (2012). Effects of dietary crude protein levels  
625 on development, antioxidant status, and total midgut protease activity of honey bee (*Apis mellifera*  
626 *ligustica*). *Apidologie*, 43(5):576–586.
- 627 Lucas, J. R. (1983). The role of foraging time constraints and variable prey encounter in optimal diet  
628 choice. *American Naturalist*, 122(2):191–209.
- 629 Lucchetti, M. A., Glauser, G., Kilchenmann, V., Dübecke, A., Beckh, G., Praz, C., and Kast, C. (2016).  
630 Pyrrolizidine alkaloids from *Echium vulgare* in honey originate primarily from floral nectar. *Journal of*  
631 *Agricultural and Food Chemistry*, 64(25):5267–5273.
- 632 Macel, M. (2011). Attract and deter: a dual role for pyrrolizidine alkaloids in plant–insect interactions.  
633 *Phytochemistry Reviews*, 10(1):75–82.
- 634 McFrederick, Q. S. and Rehan, S. M. (2016). Characterization of pollen and bacterial community  
635 composition in brood provisions of a small carpenter bee. *Molecular Ecology*, 25(10):2302–2311.
- 636 McIntosh, M. (2005). Pollination of two species of *Ferocactus*: interactions between cactus-specialist  
637 bees and their host plants. *Functional Ecology*, 19(4):727–734.
- 638 Mikát, M., Benda, D., Korittová, C., Mrozková, J., Reiterová, D., Waldhauserová, J., Brož, V., and  
639 Straka, J. (2020a). Natural history and maternal investment of *Ceratina cucurbitina*, the most common



- 640 european small carpenter bee, in different european regions. *Journal of Apicultural Research*.
- 641 Mikát, M., Černá, K., and Straka, J. (2016). Major benefits of guarding behavior in subsocial bees:  
642 implications for social evolution. *Ecology and Evolution*, 6(19):6784–6797.
- 643 Mikát, M., Franchino, C., and Rehan, S. M. (2017). Sociodemographic variation in foraging behavior and  
644 the adaptive significance of worker production in the facultatively social small carpenter bee, *Ceratina*  
645 *calcarata*. *Behavioral Ecology and Sociobiology*, 71(9):135.
- 646 Mikát, M., Janošík, L., Černá, K., Matoušková, E., Hadrava, J., Bureš, V., and Straka, J. (2019). Polyandrous  
647 bee provides extended offspring care biparentally as an alternative to monandry based eusociality.  
648 *Proceedings of the National Academy of Sciences*, 116(13):6238–6243.
- 649 Mikát, M., Waldhauserová, J., Fraňková, T., Čermáková, K., Brož, V., Zeman, Š., Dokulilová, M., and  
650 Straka, J. (2020b). Only mothers feed mature offspring in european *Ceratina* bees. *Insect Science*.
- 651 Morales, C. L. and Traveset, A. (2008). Interspecific pollen transfer: magnitude, prevalence and consequences  
652 for plant fitness. *Critical Reviews in Plant Sciences*, 27(4):221–238.
- 653 Nakagawa, S. and Schielzeth, H. (2010). Repeatability for Gaussian and non-Gaussian data: a practical  
654 guide for biologists. *Biological Reviews*, 85(4):935–956.
- 655 Narberhaus, I., Zintgraf, V., and Dobler, S. (2005). Pyrrolizidine alkaloids on three trophic levels—evidence  
656 for toxic and deterrent effects on phytophages and predators. *Chemoecology*, 15(2):121–125.
- 657 Nicholls, E. and Hempel de Ibarra, N. (2017). Assessment of pollen rewards by foraging bees. *Functional*  
658 *Ecology*, 31(1):76–87.
- 659 Noreika, N., Bartomeus, I., Winsa, M., Bommarco, R., and Öckinger, E. (2019). Pollinator foraging  
660 flexibility mediates rapid plant-pollinator network restoration in semi-natural grasslands. *Scientific*  
661 *Reports*, 9:15473.
- 662 Oksanen, J., Blanchet, F. G., Friendly, M., Kindt, R., Legendre, P., McGlenn, D., Minchin, P. R., O’Hara,  
663 R. B., Simpson, G. L., Solymos, P., Stevens, M. H. H., Szoecs, E., and Wagner, H. (2019). *vegan*:  
664 *Community Ecology Package*. R package version 2.5-6.
- 665 Palmer, T. M., Stanton, M. L., and Young, T. P. (2003). Competition and coexistence: exploring mechanisms  
666 that restrict and maintain diversity within mutualist guilds. *American Naturalist*, 162(S4):S63–  
667 S79.
- 668 Parker, A. J., Williams, N. M., and Thomson, J. D. (2016). Specialist pollinators deplete pollen in the  
669 spring ephemeral wildflower *Claytonia virginica*. *Ecology and Evolution*, 6(15):5169–5177.
- 670 Pianka, E. R. (1973). The structure of lizard communities. *Annual Review of Ecology and Systematics*,  
671 4(1):53–74.
- 672 Praz, C. J., Müller, A., and Dorn, S. (2008). Specialized bees fail to develop on non-host pollen: do plants  
673 chemically protect their pollen? *Ecology*, 89(3):795–804.
- 674 R Core Team (2020). *R: A Language and Environment for Statistical Computing*. R Foundation for  
675 Statistical Computing, Vienna, Austria.
- 676 Räsänen, K. and Kruuk, L. (2007). Maternal effects and evolution at ecological time-scales. *Functional*  
677 *Ecology*, 21(3):408–421.
- 678 Rehan, S. M., Leys, R., and Schwarz, M. P. (2012). A mid-cretaceous origin of sociality in xylocopine  
679 bees with only two origins of true worker castes indicates severe barriers to eusociality. *PLoS ONE*,  
680 7(4).
- 681 Rehan, S. M. and Richards, M. H. (2010). Nesting biology and subsociality in *Ceratina calcarata*  
682 (Hymenoptera: Apidae). *The Canadian Entomologist*, 142(1):65–74.
- 683 Roughgarden, J. (1972). Evolution of niche width. *American Naturalist*, 106(952):683–718.
- 684 Roughgarden, J. (1974). Niche width: biogeographic patterns among anolis lizard populations. *American*  
685 *Naturalist*, 108(962):429–442.
- 686 Roulston, T. H. and Cane, J. H. (2000). Pollen nutritional content and digestibility for animals. In Dafni,  
687 A., Hesse, M., and Pacini, E., editors, *Pollen and Pollination*, pages 187–209. Springer, Vienna, Austria.
- 688 Roulston, T. H. and Cane, J. H. (2002). The effect of pollen protein concentration on body size in the  
689 sweat bee *Lasioglossum zephyrum* (Hymenoptera: Apiformes). *Evolutionary Ecology*, 16(1):49–65.
- 690 Schielzeth, H. and Nakagawa, S. (2013). *rptR: Repeatability for Gaussian and non-Gaussian data*. R  
691 package version 0.6.405/r52.
- 692 Schoener, T. W. (1974). Resource partitioning in ecological communities. *Science*, 185(4145):27–39.
- 693 Sedivy, C., Dorn, S., Widmer, A., and Müller, A. (2013). Host range evolution in a selected group of  
694 osmiine bees (Hymenoptera: Megachilidae): the Boraginaceae-Fabaceae paradox. *Biological Journal*

- 695 *of the Linnean Society*, 108(1):35–54.
- 696 Sedivy, C., Müller, A., and Dorn, S. (2011). Closely related pollen generalist bees differ in their ability to  
697 develop on the same pollen diet: evidence for physiological adaptations to digest pollen. *Functional*  
698 *Ecology*, 25(3):718–725.
- 699 Sickel, W., Ankenbrand, M. J., Grimmer, G., Holzschuh, A., Härtel, S., Lanzen, J., Steffan-Dewenter, I.,  
700 and Keller, A. (2015). Increased efficiency in identifying mixed pollen samples by meta-barcoding  
701 with a dual-indexing approach. *BMC Ecology*, 15(1):20.
- 702 Slaa, J. E., Cevaal, A., and Sommeijer, M. J. (1998). Floral constancy in *Trigona* stingless bees foraging  
703 on artificial flower patches: a comparative study. *Journal of Apicultural Research*, 37(3):191–198.
- 704 Somerville, D. and Nicol, H. (2006). Crude protein and amino acid composition of honey bee-collected  
705 pollen pellets from south-east Australia and a note on laboratory disparity. *Australian Journal of*  
706 *Experimental Agriculture*, 46(1):141–149.
- 707 Strickler, K. (1979). Specialization and foraging efficiency of solitary bees. *Ecology*, 60(5):998–1009.
- 708 Szigeti, V., Kőrösi, Á., Harnos, A., and Kis, J. (2019). Lifelong foraging and individual specialisation are  
709 influenced by temporal changes of resource availability. *Oikos*, 128(5):649–658.
- 710 Taberlet, P., Bonin, A., Coissac, E., and Zinger, L. (2018). *Environmental DNA: For biodiversity research*  
711 *and monitoring*. Oxford University Press.
- 712 Trunz, V., Lucchetti, M. A., Bénon, D., Dorchin, A., Desurmont, G. A., Kast, C., Rasmann, S., Glauser,  
713 G., and Praz, C. J. (2020). To bee or not to bee: The ‘raison d’être’ of toxic secondary compounds in  
714 the pollen of Boraginaceae. *Functional Ecology*, 34(7):1345–1357.
- 715 Van Valen, L. (1965). Morphological variation and width of ecological niche. *American Naturalist*,  
716 99(908):377–390.
- 717 Vaudo, A. D., Patch, H. M., Mortensen, D. A., Tooker, J. F., and Grozinger, C. M. (2016). Macronutrient  
718 ratios in pollen shape bumble bee (*Bombus impatiens*) foraging strategies and floral preferences.  
719 *Proceedings of the National Academy of Sciences*, 113(28):E4035–E4042.
- 720 Vaudo, A. D., Tooker, J. F., Grozinger, C. M., and Patch, H. M. (2015). Bee nutrition and floral resource  
721 restoration. *Current Opinion in Insect Science*, 10:133–141.
- 722 Vaudo, A. D., Tooker, J. F., Patch, H. M., Biddinger, D. J., Coccia, M., Crone, M. K., Fiely, M., Francis,  
723 J. S., Hines, H. M., Hodges, M., et al. (2020). Pollen protein: Lipid macronutrient ratios may guide  
724 broad patterns of bee species floral preferences. *Insects*, 11(2):132.
- 725 Waser, N. M. (1978). Interspecific pollen transfer and competition between co-occurring plant species.  
726 *Oecologia*, 36(2):223–236.
- 727 Waser, N. M. (1986). Flower constancy: definition, cause, and measurement. *American Naturalist*,  
728 127(5):593–603.
- 729 Wells, H. and Rathore, R. R. (1994). Foraging ecology of the asian hive bee, *Apis cerana indica*, within  
730 artificial flower patches. *Journal of Apicultural Research*, 33(4):219–230.
- 731 Wild, J., Kaplan, Z., Danihelka, J., Petřík, P., Chytrý, M., Novotný, P., Rohn, M., Šulc, V., Brůna, J.,  
732 Chobot, K., et al. (2019). Plant distribution data for the Czech Republic integrated in the Pladias  
733 database. *Preslia*, 91:1–24.
- 734 Zinger, L., Bonin, A., Alsos, I. G., Bálint, M., Bik, H., Boyer, F., Chariton, A. A., Creer, S., Coissac, E.,  
735 Deagle, B. E., et al. (2019). DNA metabarcoding—need for robust experimental designs to draw sound  
736 ecological conclusions. *Molecular Ecology*, 28(8):1857–1862.
